# Supplementary material for: Polymorphisms in the NSUN1 gene and neuroblastoma risk in Chinese children from Jiangsu province
Source: PubMed Central journal article supplement (PMC11685692; doi:10.7150/jca.103097), 2025-01-01
Supplement: jcav16p0622s1.pdf [file jcav16p0622s1.pdf]

**Table S1.** Demographic characteristics of neuroblastoma patients and cancer-free controls from Jiangsu province

| Variables              | Cases (N=402) |       | Controls (N=473) |       | <i>P</i> <sup>a</sup> |
|------------------------|---------------|-------|------------------|-------|-----------------------|
|                        | No.           | %     | No.              | %     |                       |
| Age range, month       | 0.033-168.00  |       | 0.367-168.00     |       |                       |
| Mean ± SD              | 40.99 ± 35.49 |       | 40.88 ± 29.76    |       | 0.962 <sup>b</sup>    |
| Age                    |               |       |                  |       | 0.100                 |
| ≤18 months             | 139           | 34.58 | 139              | 29.39 |                       |
| >18 months             | 263           | 65.42 | 334              | 70.61 |                       |
| Gender                 |               |       |                  |       | 0.987                 |
| Female                 | 191           | 47.51 | 225              | 47.57 |                       |
| Male                   | 211           | 52.49 | 248              | 52.43 |                       |
| Sites of origin        |               |       |                  |       |                       |
| Adrenal gland          | 93            | 23.13 | /                | /     |                       |
| Retroperitoneal region | 167           | 41.54 | /                | /     |                       |
| Mediastinum            | 120           | 29.85 | /                | /     |                       |
| Other region           | 18            | 4.48  | /                | /     |                       |
| NA                     | 4             | 1.00  | /                | /     |                       |
| INSS stages            |               |       |                  |       |                       |
| I                      | 108           | 26.87 | /                | /     |                       |
| II                     | 63            | 15.67 | /                | /     |                       |
| III                    | 59            | 14.68 | /                | /     |                       |
| IV                     | 104           | 25.87 | /                | /     |                       |
| 4s                     | 2             | 0.50  | /                | /     |                       |
| NA                     | 66            | 16.42 | /                | /     |                       |

SD, standard deviation; NA, not available; INSS, International Staging System for Neuroblastoma.

<sup>a</sup> Two-sided  $\chi^2$  test between neuroblastoma patients and cancer-free controls.

<sup>b</sup> t test between neuroblastoma patients and cancer-free controls.
